# Supplementary material
Source: HighWire-hosted journal article supplement (https://jnm.snmjournals.org/highwire/filestream/94348/field_highwire_adjunct_files/0/108456_Supplemental_Data.pdf)
Supplement: 108456_Supplemental_Data.pdf [file 108456_Supplemental_Data.pdf]

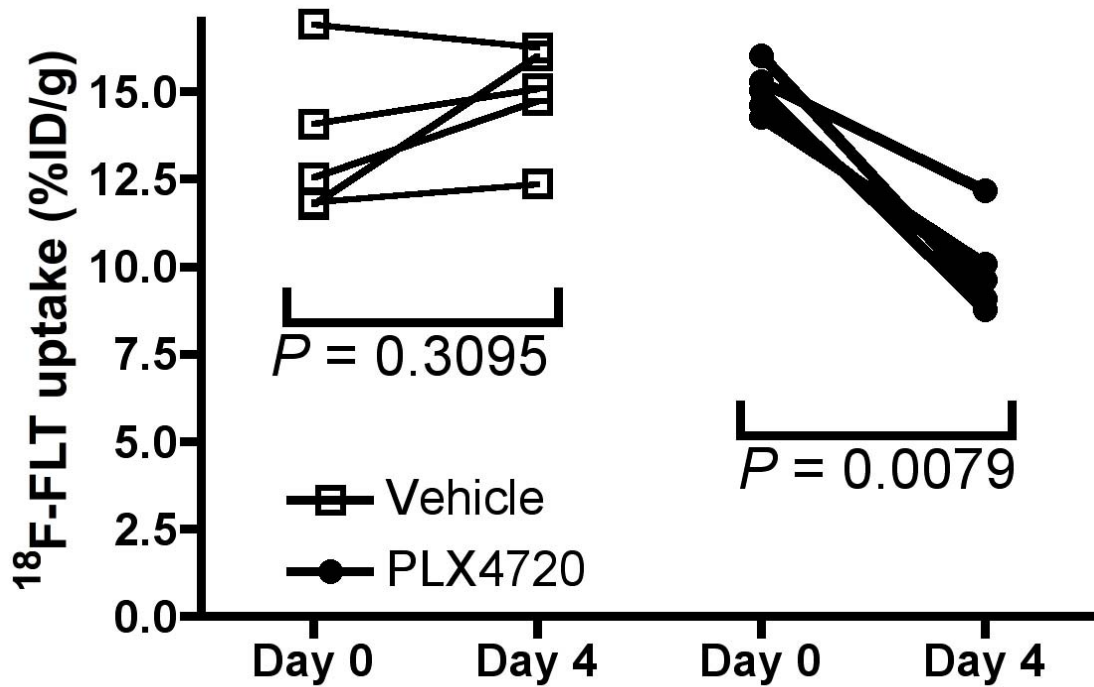

**Supplemental Figure 1. Pre-treatment/post-treatment comparison of  $^{18}\text{F-FLT}$  uptake in Lim2405 xenograft tumors.** Pre-treatment and post-treatment  $^{18}\text{F-FLT}$  uptake was similar in vehicle-treated Lim2405 xenografts. In PLX4720-treated xenografts,  $^{18}\text{F-FLT}$  was significantly reduced for each individual mouse imaged.

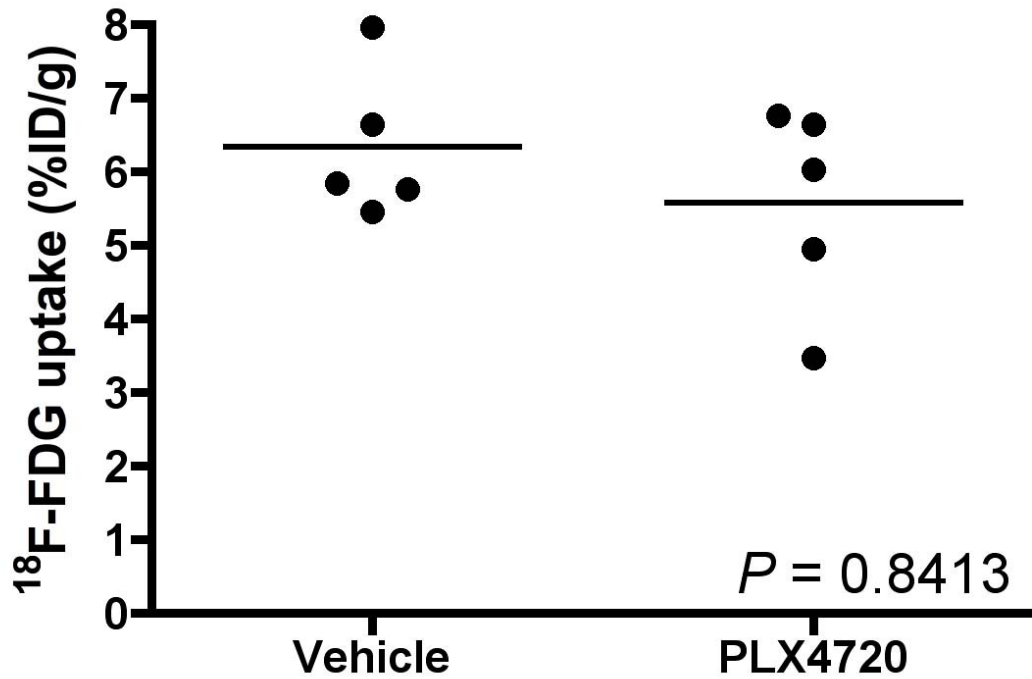

Supplemental Figure 2. <sup>18</sup>F-FDG PET is similar between vehicle-treated and PLX4720-treated Lim2405 xenograft tumors. Contrary to <sup>18</sup>F-FLT PET (see **Figure 2, Supplemental Figure 1**), no statistically significant difference in <sup>18</sup>F-FDG uptake was observed between vehicle-treated and PLX4720-treated Lim2405 xenografts.

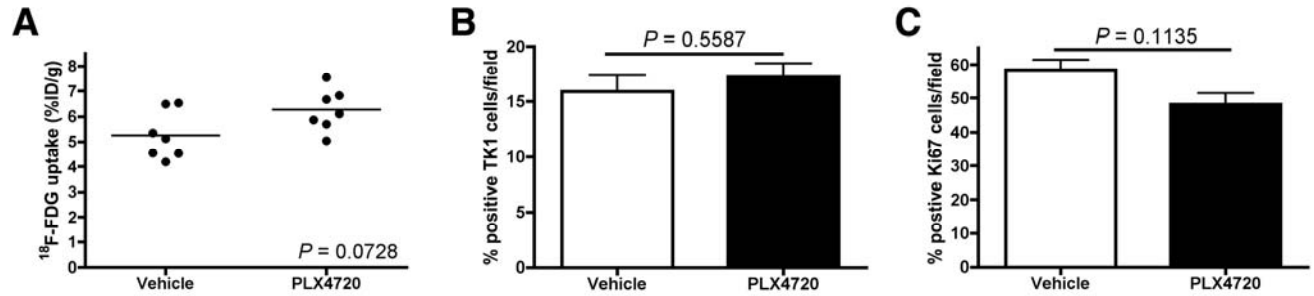

**Supplemental Figure 3.  $^{18}\text{F}$ -FDG PET is similar between vehicle-treated and PLX4720-treated HT-29 xenografts and agrees with immunohistochemistry markers of proliferation.** (A) Similar to  $^{18}\text{F}$ -FLT PET in HT-29 xenografts, no difference was observed between vehicle-treated and PLX4720-treated HT-29 tumor xenografts using  $^{18}\text{F}$ -FDG PET. Corroborating PET, biochemical, and MALDI results (see **Figure 5**), TK1 (B) and Ki67 (C) in vehicle-treated and PLX4720-treated HT-29 xenografts exhibited similar immunoreactivity.
